# Supplementary material for: Utilization of snail shells to synthesise hydroxyapatite nanorods for orthopedic applications
Source: Royal Society of Chemistry journal article supplement (doi:10.1039/c5ra04402b), 2015-01-01
Supplement: c5ra04402b1.pdf [file c5ra04402b1.pdf]

### **Electronic Supplementary Information**

We have studied the effect of microwave irradiation time on the formation of HA. It is found that size of nanorod increased with increases of irradiation time. The morphology of HA synthesized under microwave irradiation for 30 min is shown in Fig. S1 indicates the formation of microrods having length 1.5 to 2  $\mu\text{m}$  and width 0.4 to 0.5  $\mu\text{m}$ . Aim of our work is synthesis of HA nanorods from snail shell waste. Hence this figure is not included in the manuscript.

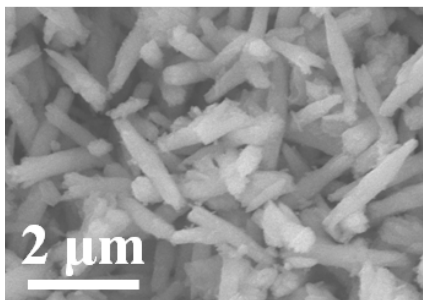

Fig. S1. Morphology of HA synthesized under microwave irradiation for 30 min.
